# Supplementary material
Source: publisher figshare collection journal article supplement (https://tandf.figshare.com/articles/dataset/_/19688963)

# CRISPRCas\_100\_1

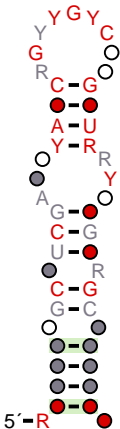

# CRISPRCas\_101\_1

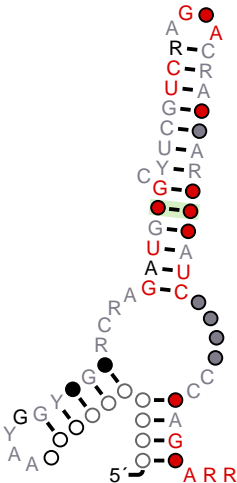

# CRISPRCas\_10\_1

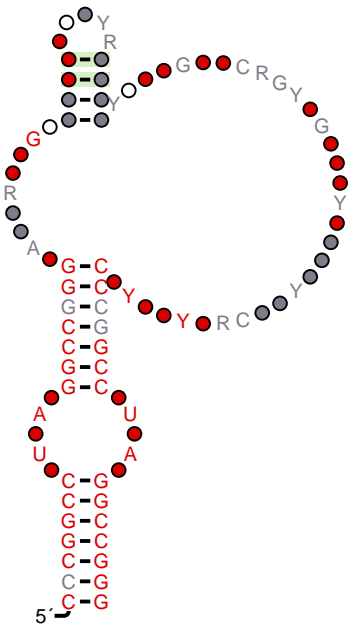

# CRISPRCas\_102\_1

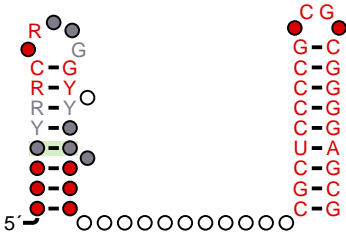

## CRISPRCas\_103\_1

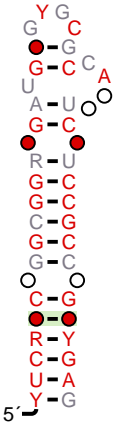

# CRISPRCas\_104\_1

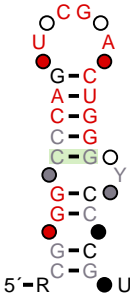

# CRISPRCas\_105\_1

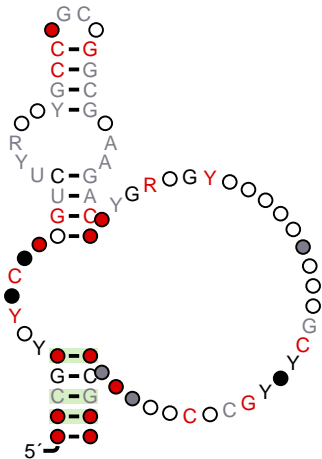

# CRISPRCas\_106\_1

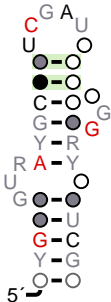



# CRISPRCas\_107\_1

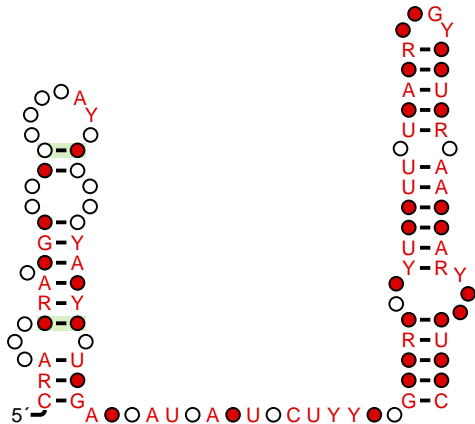

CRISPRCas\_108\_1

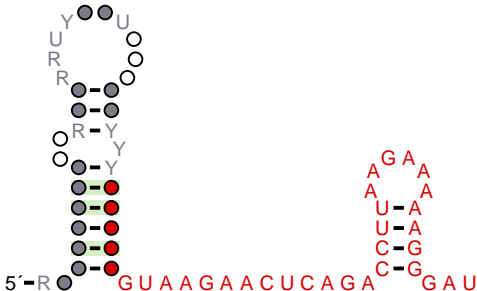



# CRISPRCas\_110\_1

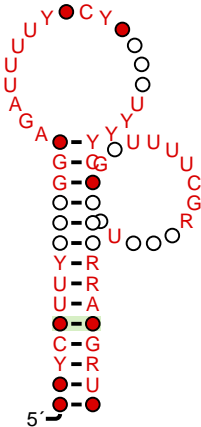

# CRISPRCas\_111\_1

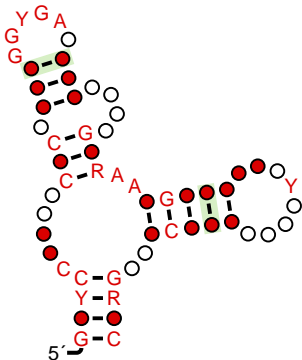

# CRISPRCas\_11\_1

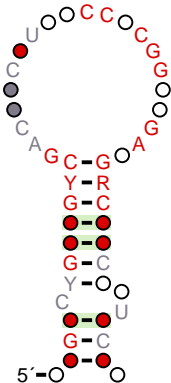

## CRISPRCas\_112\_1

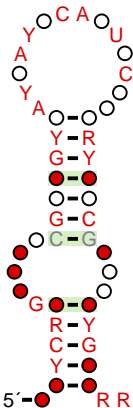

# CRISPRCas\_113\_1

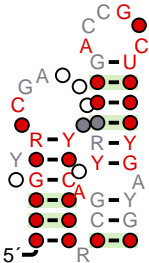



## CRISPRCas\_114\_1

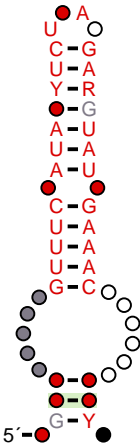

# CRISPRCas\_115\_1

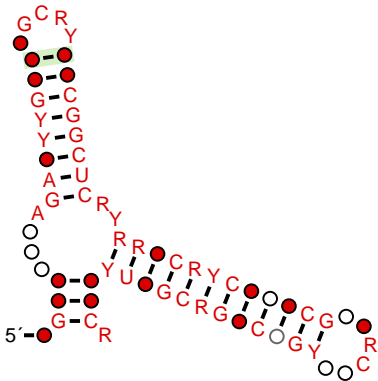

# CRISPRCas\_116\_1

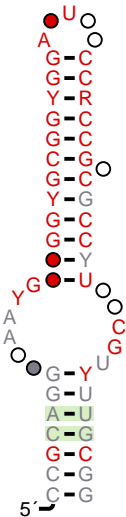

## CRISPRCas\_117\_1

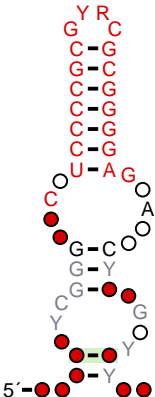

## CRISPRCas\_118\_1

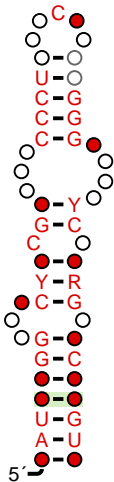

# CRISPRCas\_119\_1

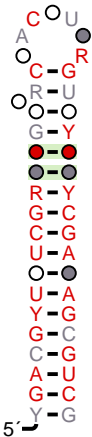

# CRISPRCas\_1\_1

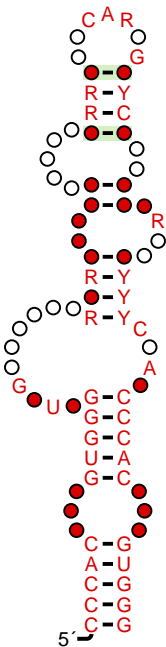

## CRISPRCas\_120\_1

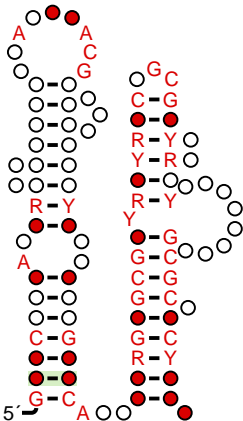



## CRISPRCas\_121\_1

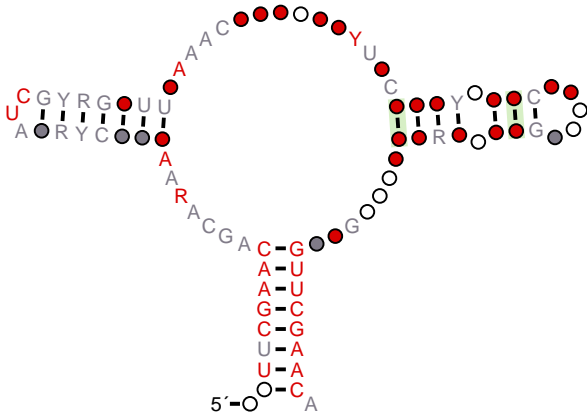

# CRISPRCas\_12\_1

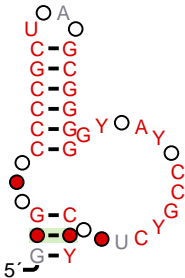

## CRISPRCas\_122\_1

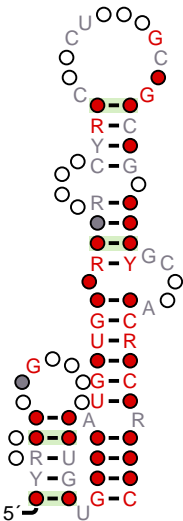

# CRISPRCas\_123\_1

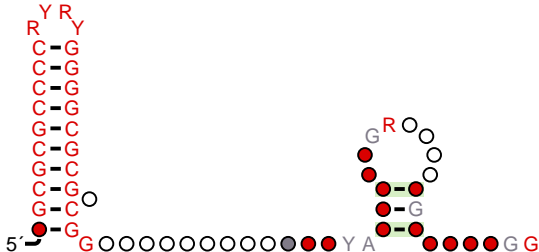

# CRISPRCas\_124\_1

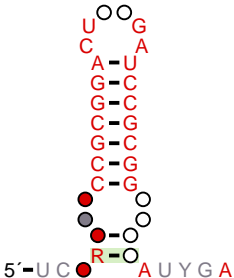

# CRISPRCas\_125\_1

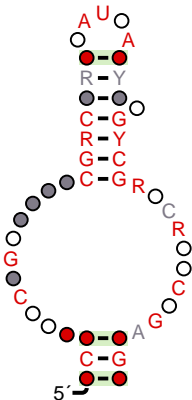

# CRISPRCas\_126\_1

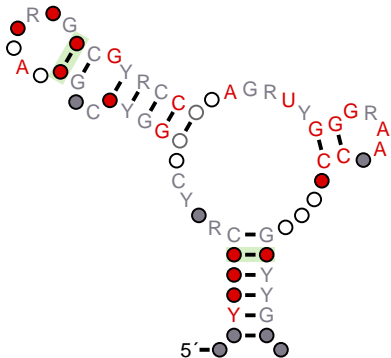

# CRISPRCas\_127\_1

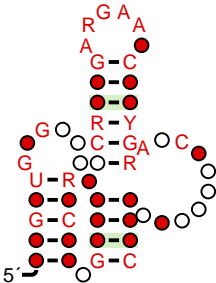



# CRISPRCas\_128\_1

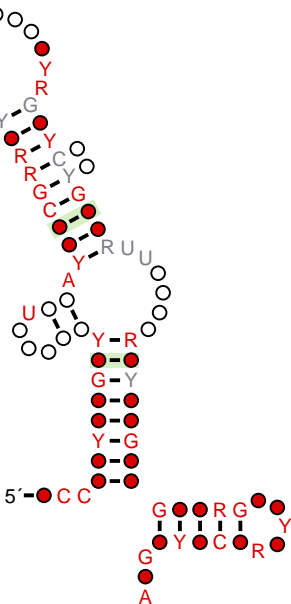

# CRISPRCas\_129\_1

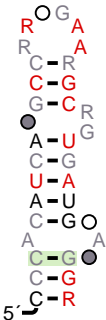

# CRISPRCas\_130\_1

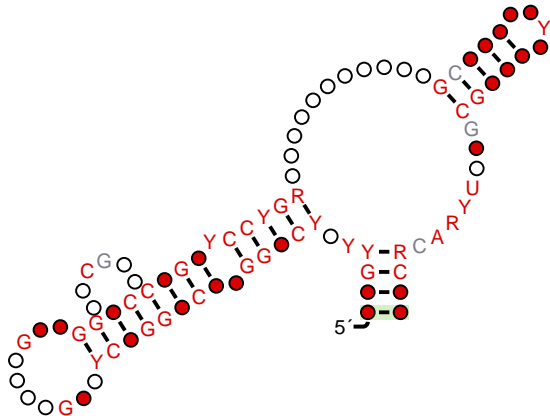

## CRISPRCas\_131\_1

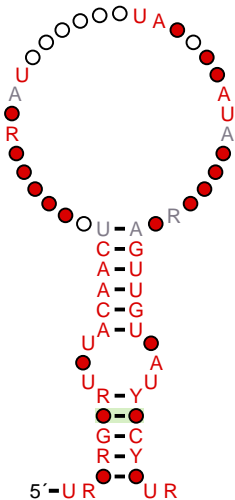

# CRISPRCas\_13\_1

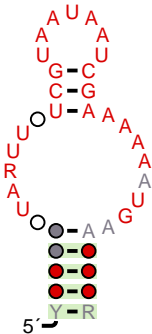

CRISPRCas\_132\_1

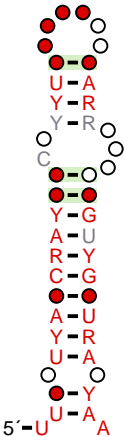

# CRISPRCas\_133\_1

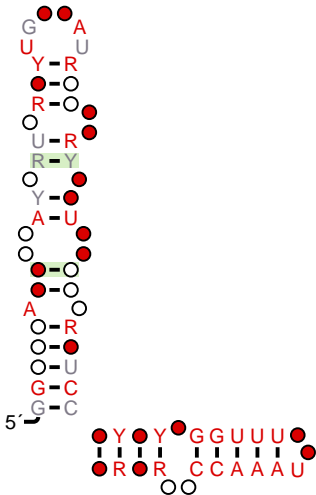

## CRISPRCas\_134\_1

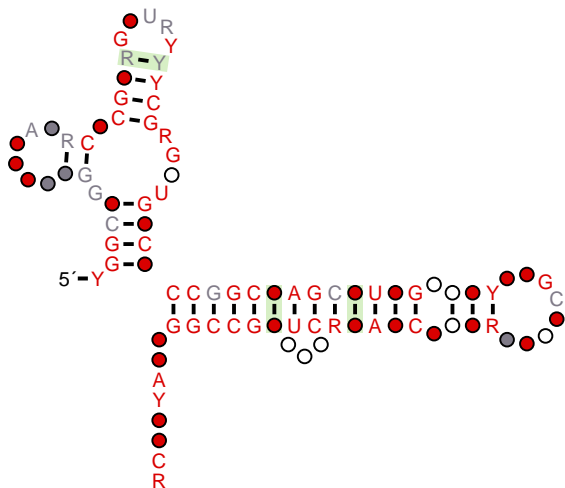



# CRISPRCas\_135\_1

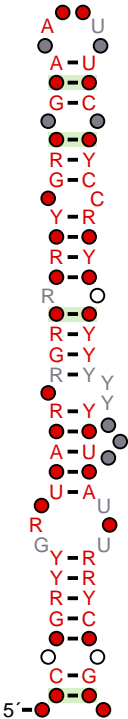

# CRISPRCas\_136\_1

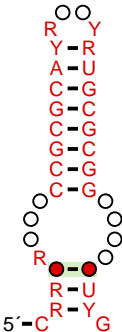

# CRISPRCas\_137\_1

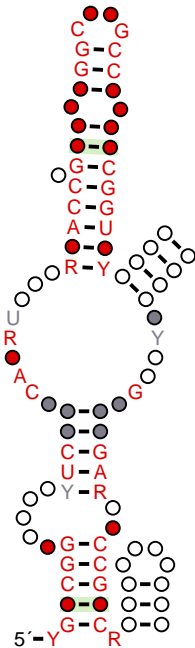

## CRISPRCas\_138\_1

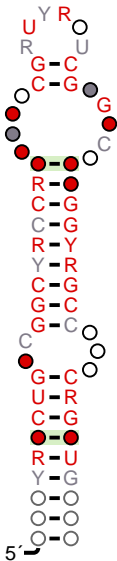

# CRISPRCas\_139\_1

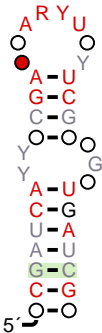

# CRISPRCas\_140\_1

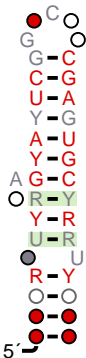

# CRISPRCas\_141\_1

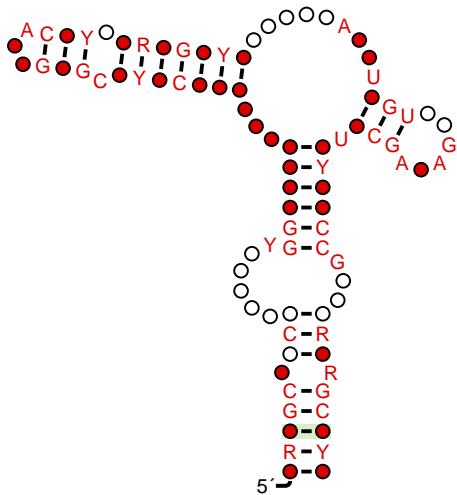

# CRISPRCas\_14\_1

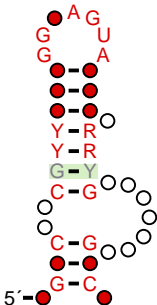



CRISPRCas\_142\_1

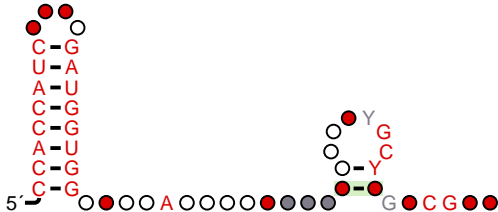

# CRISPRCas\_143\_1

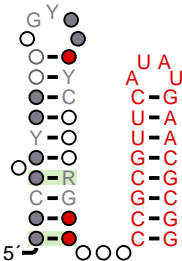

# CRISPRCas\_144\_1

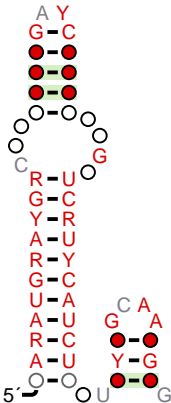

# CRISPRCas\_145\_1

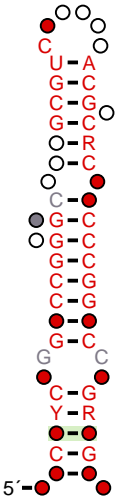

# CRISPRCas\_146\_1

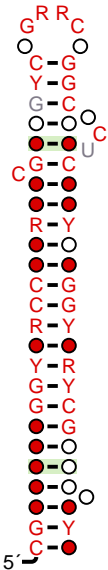

# CRISPRCas\_147\_1

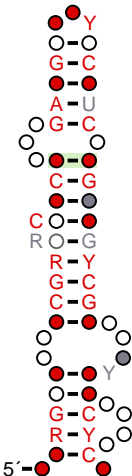

## CRISPRCas\_148\_1

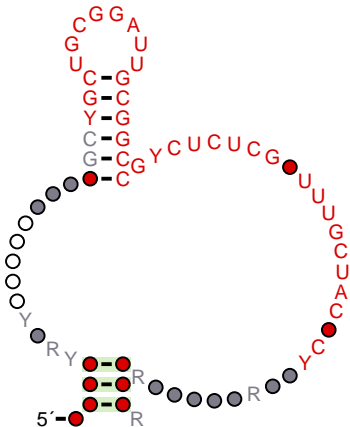

# CRISPRCas\_149\_1

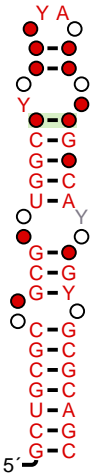



# CRISPRCas\_150\_1

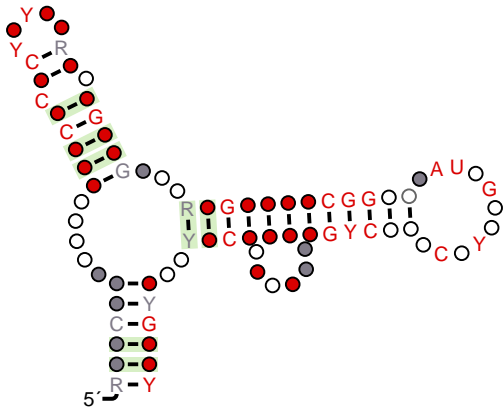

# CRISPRCas\_151\_1

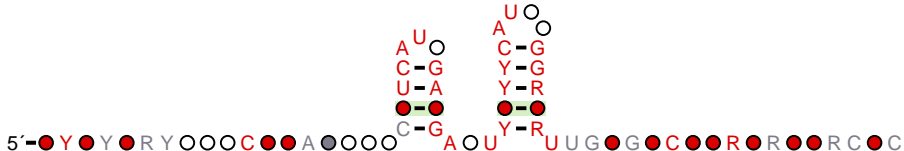

# CRISPRCas\_15\_1

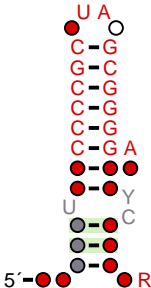

## CRISPRCas\_152\_1

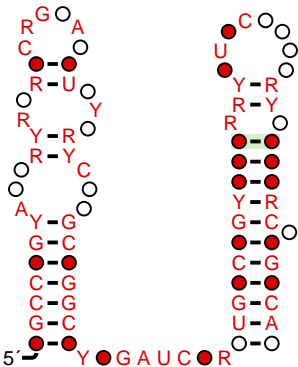

# CRISPRCas\_153\_1

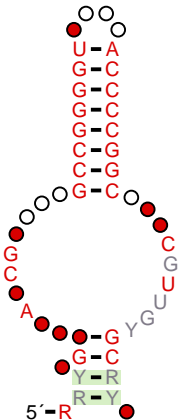

# CRISPRCas\_154\_1

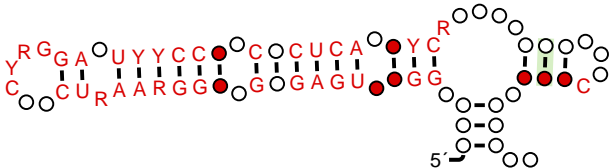

# CRISPRCas\_155\_1

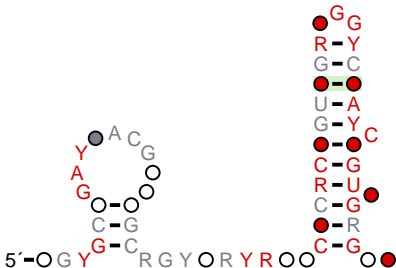

# CRISPRCas\_156\_1

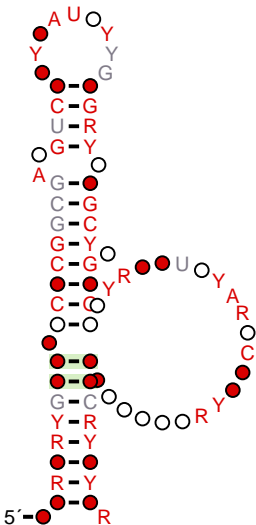



# CRISPRCas\_16\_1

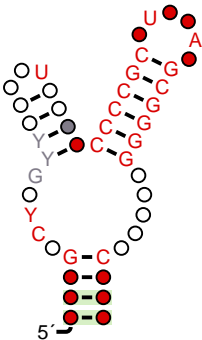

# CRISPRCas\_17\_1

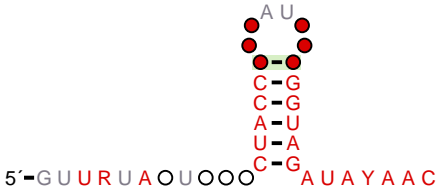



# CRISPRCas\_19\_1

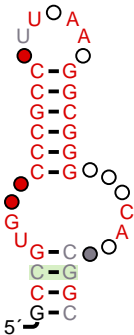

# CRISPRCas\_20\_1

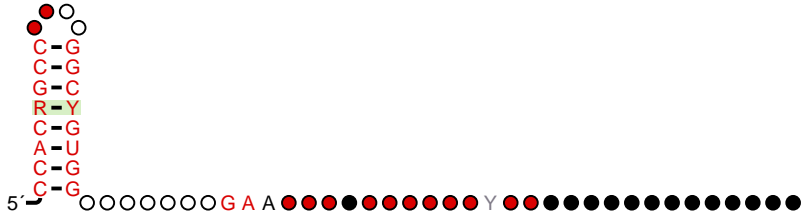

# CRISPRCas\_21\_1

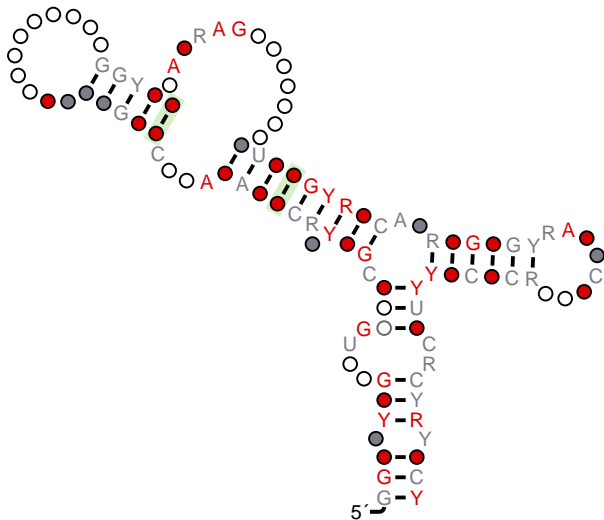

# CRISPRCas\_2\_1

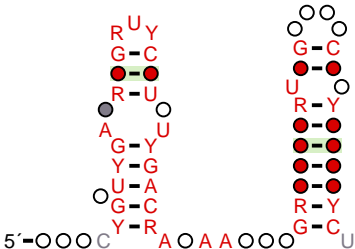

# CRISPRCas\_22\_1

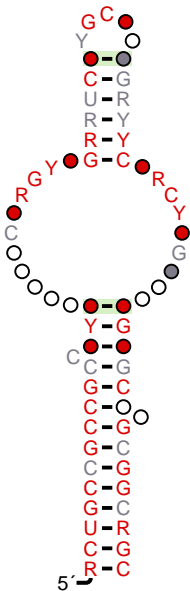



# CRISPRCas\_23\_1

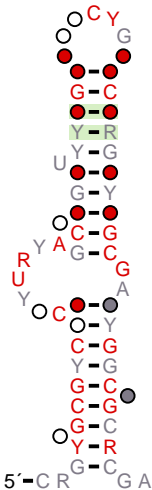

## CRISPRCas\_24\_1

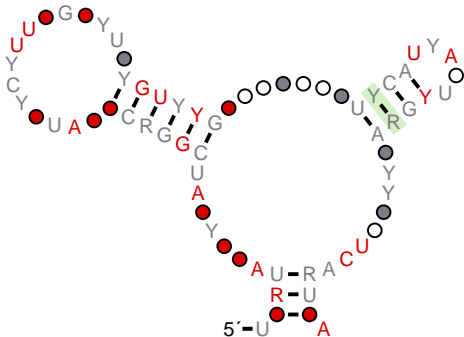

# CRISPRCas\_25\_1

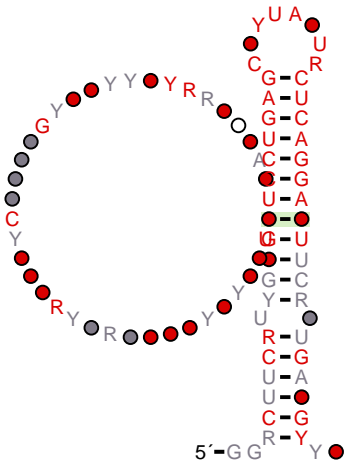

# CRISPRCas\_26\_1

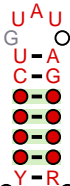

5'-R AUCOO YGGAAUU

# CRISPRCas\_27\_1

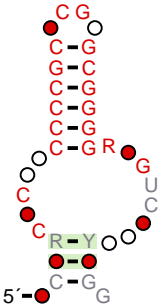

# CRISPRCas\_28\_1

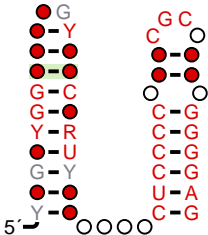

# CRISPRCas\_29\_1

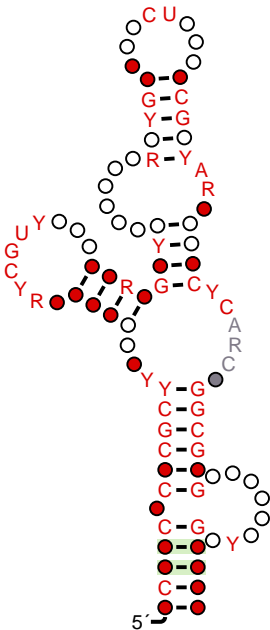

# CRISPRCas\_30\_1

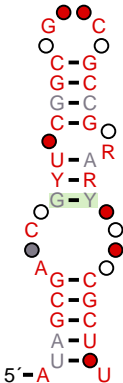



# CRISPRCas\_31\_1

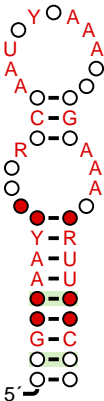

# CRISPRCas\_3\_1

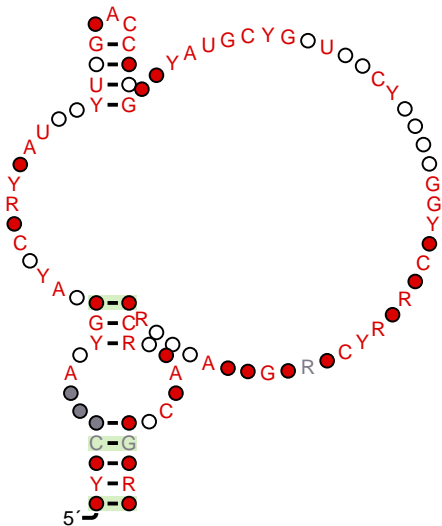

# CRISPRCas\_32\_1

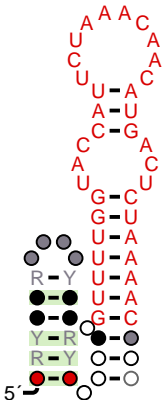



# CRISPRCas\_34\_1

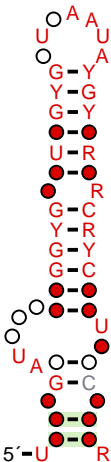





# CRISPRCas\_37\_1

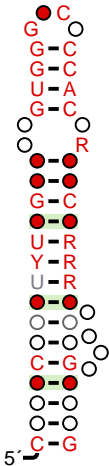



## CR/SPRCas\_38\_1

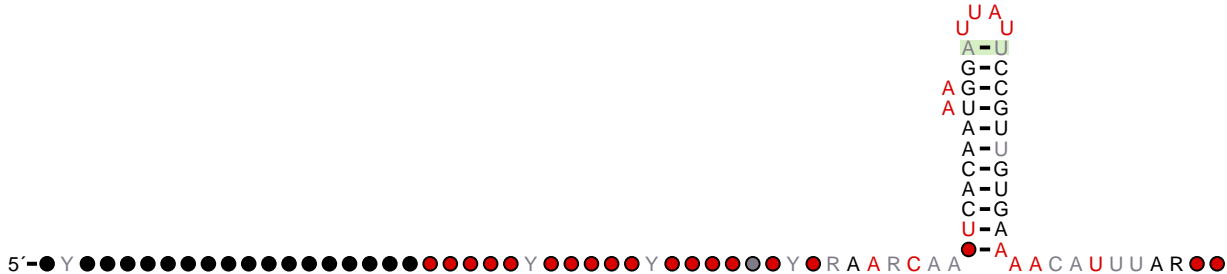

# CRISPRCas\_39\_1

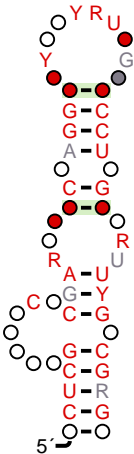

# CRISPRCas\_40\_1

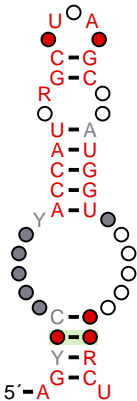

# CRISPRCas\_41\_1

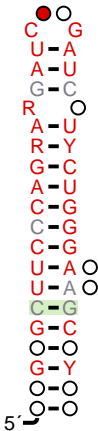

# CRISPRCas\_4\_1

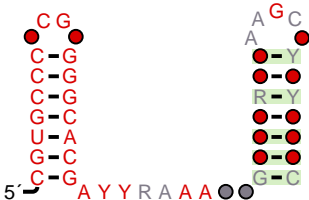

# CRISPRCas\_42\_1

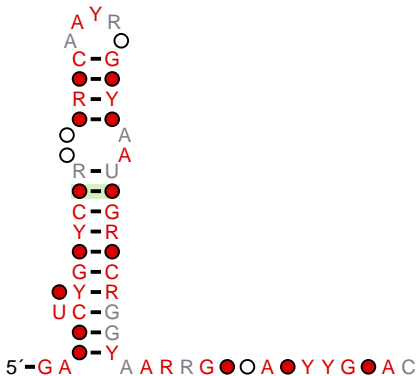

# CRISPRCas\_43\_1

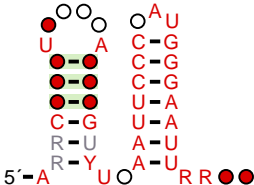

# CRISPRCas\_44\_1

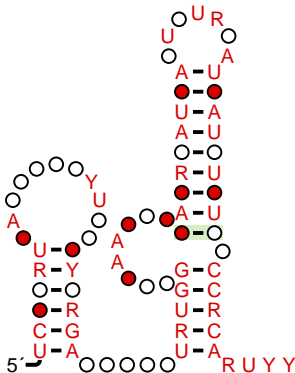



CRISPRCas\_45\_1

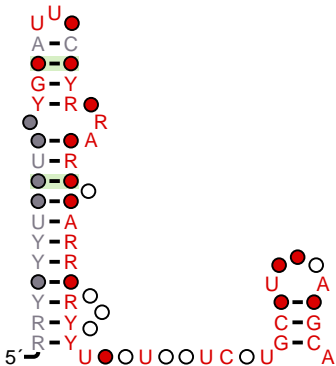

# CRISPRCas\_46\_1

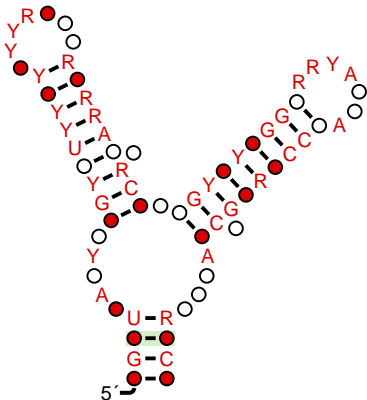

# CRISPRCas\_47\_1

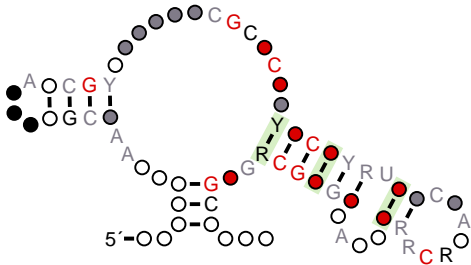

# CRISPRCas\_48\_1

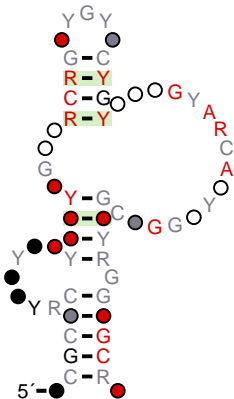

# CRISPRCas\_49\_1

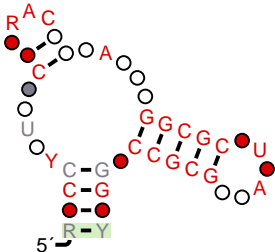

# CRISPRCas\_50\_1

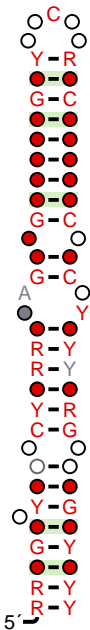

# CRISPRCas\_51\_1

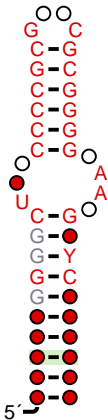

# CRISPRCas\_5\_1

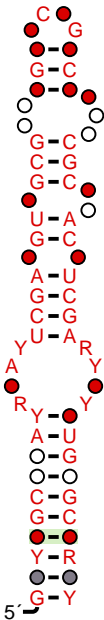



# CRISPRCas\_52\_1

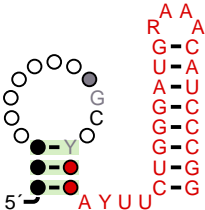

# CRISPRCas\_53\_1

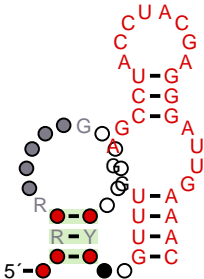

# CRISPRCas\_54\_1

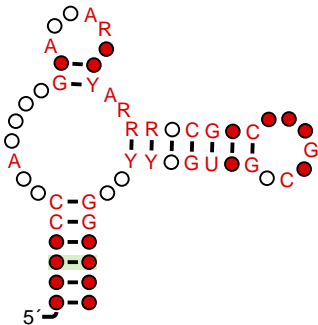

# CRISPRCas\_55\_1

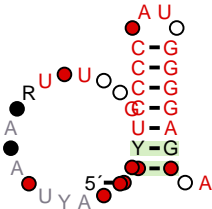

# CRISPRCas\_56\_1

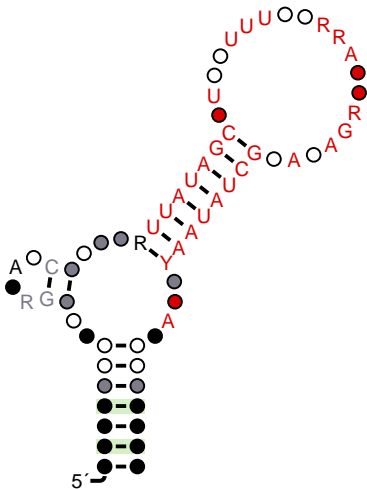

# CRISPRCas\_57\_1

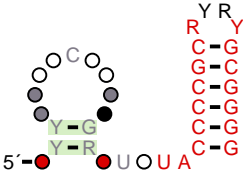

# CRISPRCas\_58\_1

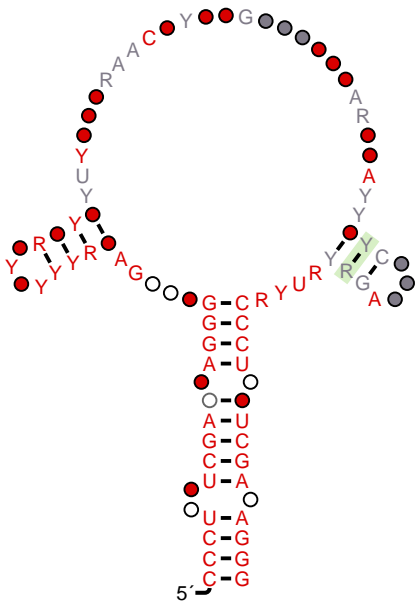

# CRISPRCas\_59\_1

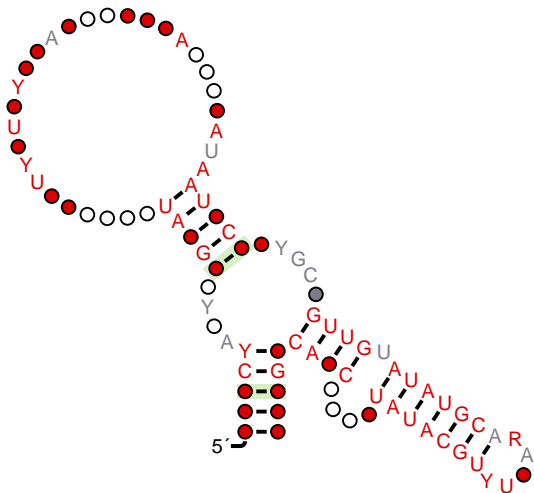



## CRISPRCas\_60\_1

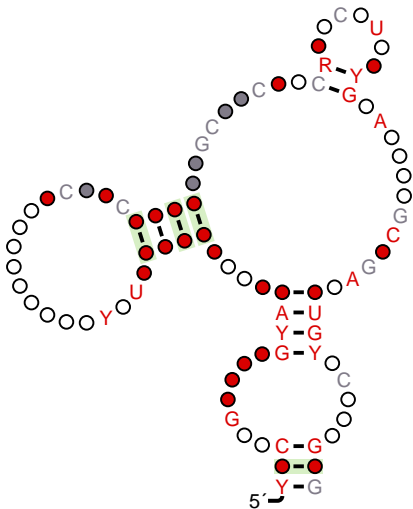

# CRISPRCas\_61\_1

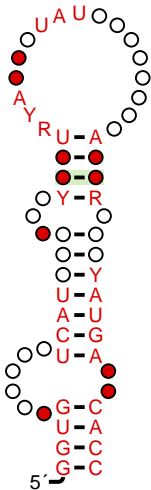

# CRISPRCas\_6\_1

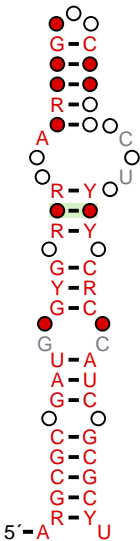

# CRISPRCas\_62\_1

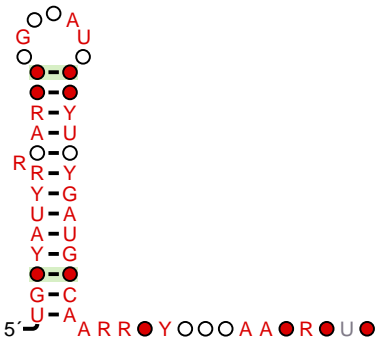

# CRISPRCas\_63\_1

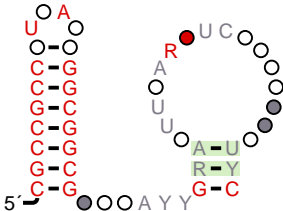

## CRISPRCas\_64\_1

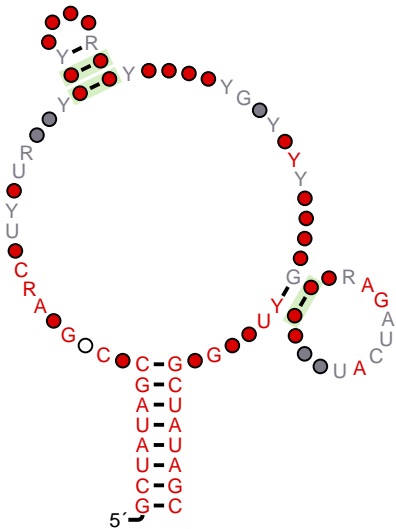

# CRISPRCas\_65\_1

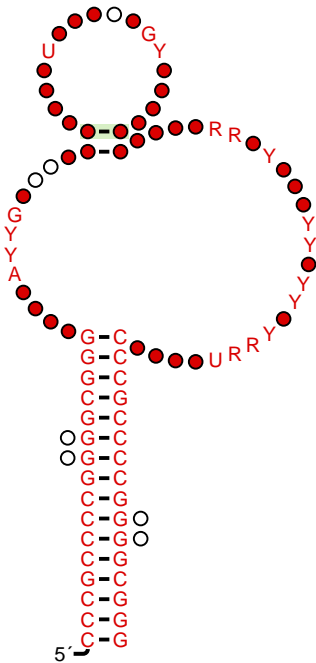

# CRISPRCas\_66\_1

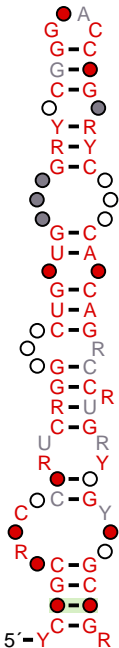



# CRISPRCas\_67\_1

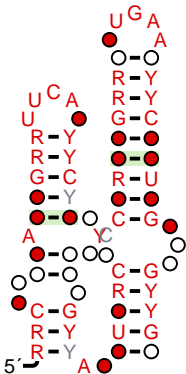

# CRISPRCas\_68\_1

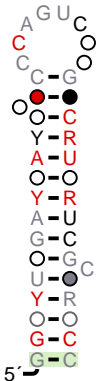

# CRISPRCas\_69\_1

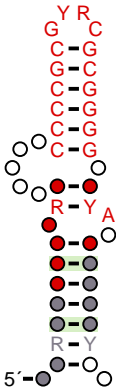

# CRISPRCas\_70\_1

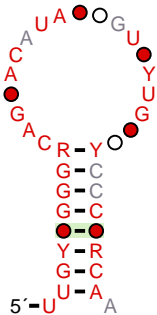

# CRISPRCas\_71\_1

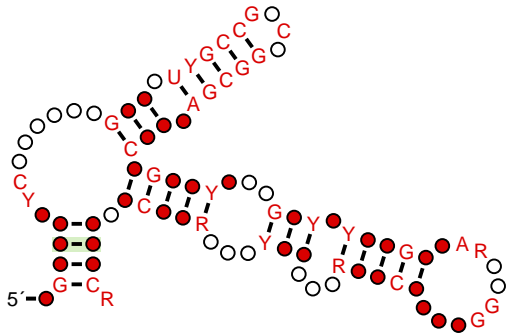

# CRISPRCas\_7\_1

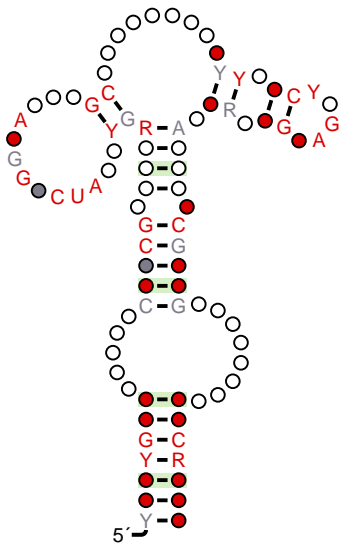

# CRISPRCas\_72\_1

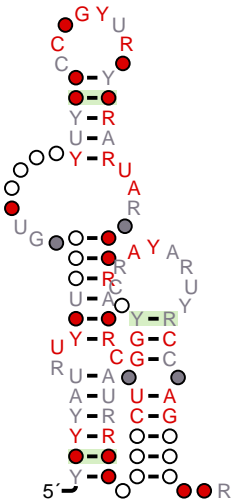

# CRISPRCas\_73\_1

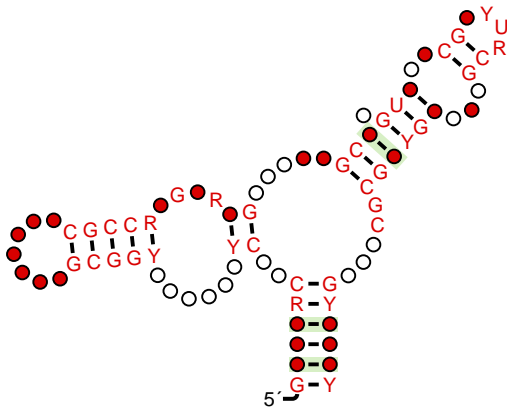



# CRISPRCas\_74\_1

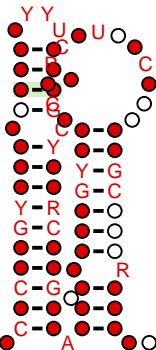

5'-CCRC- A O O O O O G G

# CRISPRCas\_75\_1

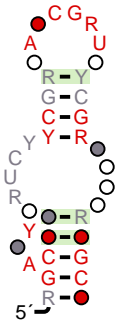

# CRISPRCas\_76\_1

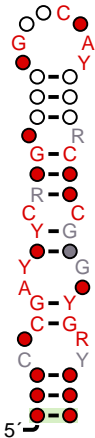

# CRISPRCas\_77\_1

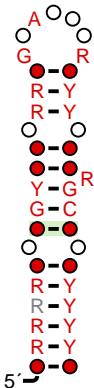

# CRISPRCas\_78\_1

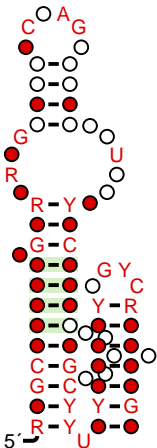

# CRISPRCas\_79\_1

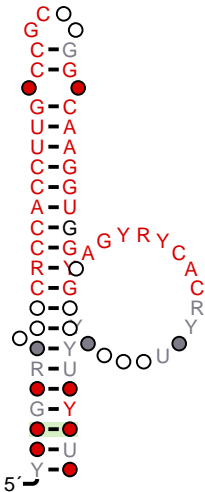

# CRISPRCas\_80\_1

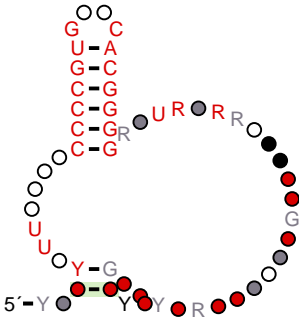

# CRISPRCas\_81\_1

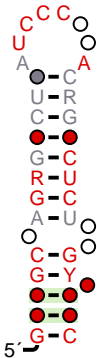



# CRISPRCas\_8\_1

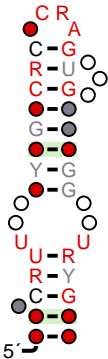

# CRISPRCas\_82\_1

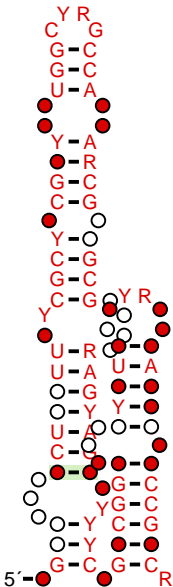

# CRISPRCas\_83\_1

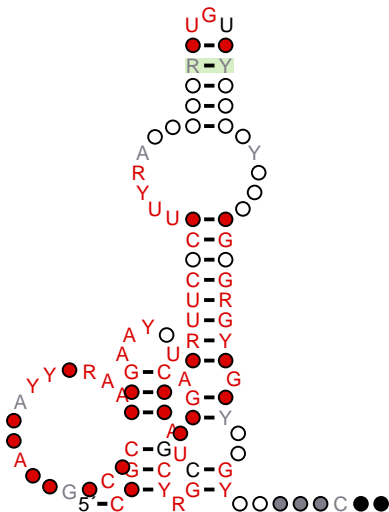

# CRISPRCas\_84\_1

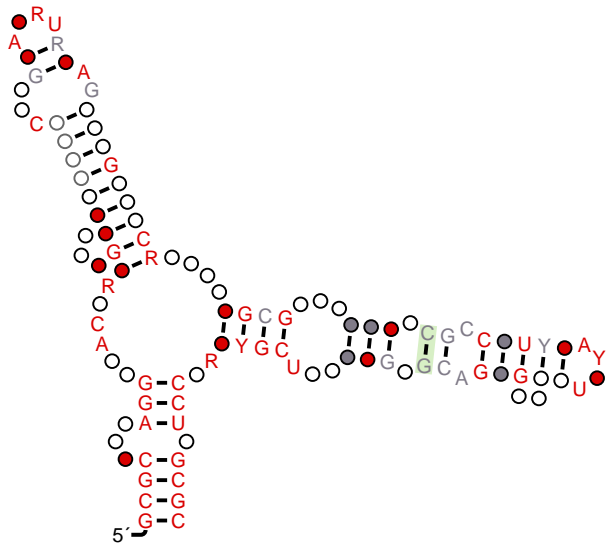

# CRISPRCas\_85\_1

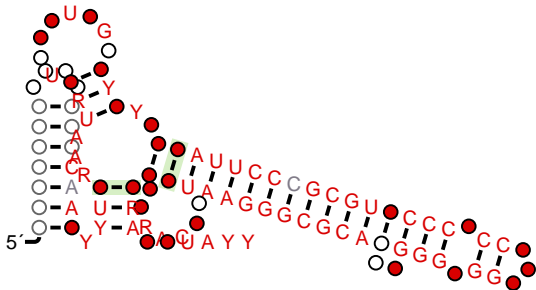

## CRISPRCas\_86\_1

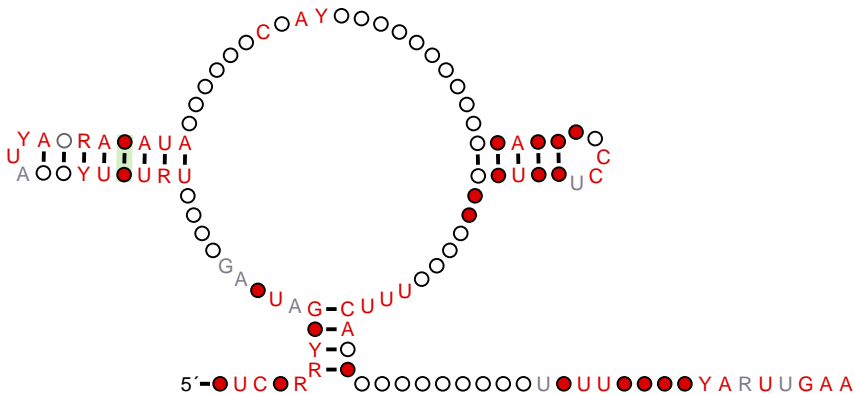

## CRISPRCas\_87\_1

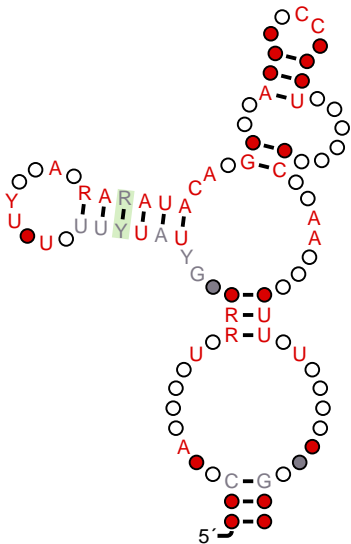

# CRISPRCas\_88\_1

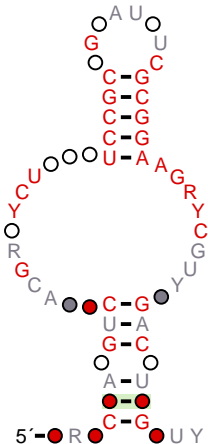



## CRISPRCas\_89\_1

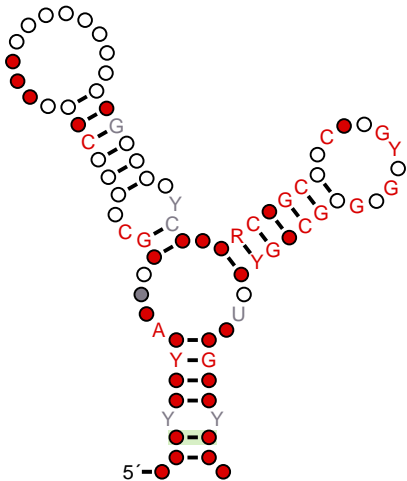

## CRISPRCas\_90\_1

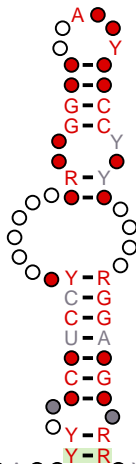

5'-000000000000000000A000R Y 000A00 T-R 0Y Y 00R 0Y Y 0Y Y 0000U R Y 00U

# CRISPRCas\_91\_1

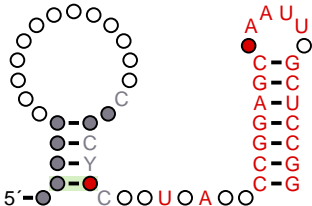

# CRISPRCas\_9\_1

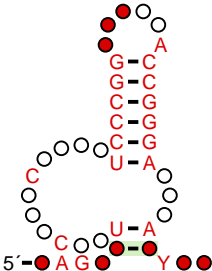

# CRISPRCas\_92\_1

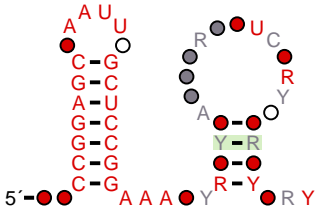

# CRISPRCas\_93\_1

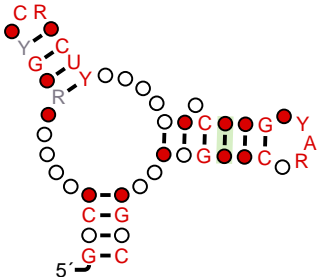

# CRISPRCas\_94\_1

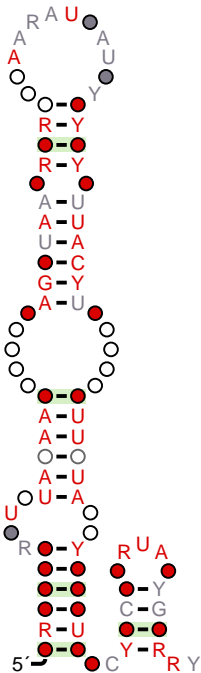

# CRISPRCas\_95\_1

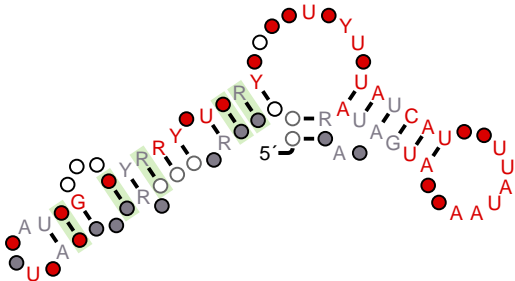



# CRISPRCas\_96\_1

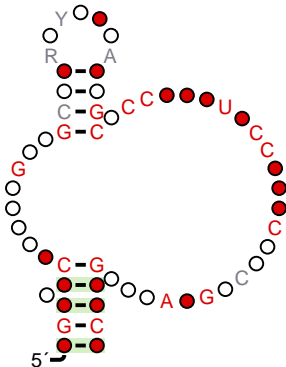

# CRISPRCas\_97\_1

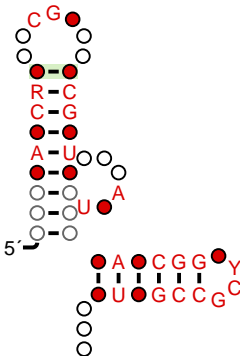

# CRISPRCas\_98\_1

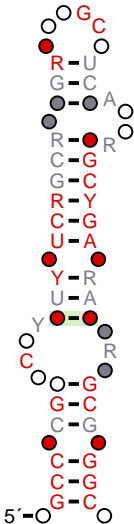

# CRISPRCas\_99\_1

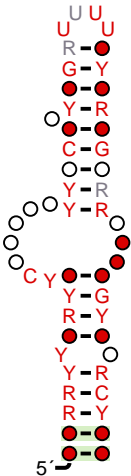

Supplement: Supplementary file 1 [file 1]
